# Supplementary material for: Upcycling aromatic polymers through C–H fluoroalkylation
Source: Royal Society of Chemistry journal article supplement (doi:10.1039/c9sc01425j), 2019-01-01

# Waste management aced: Modifying non-recyclable plastics into upcycled products

Plastics (long-chain polymers) are omnipresent and recycling them is difficult, which results in their accumulation in the environment and pollution.

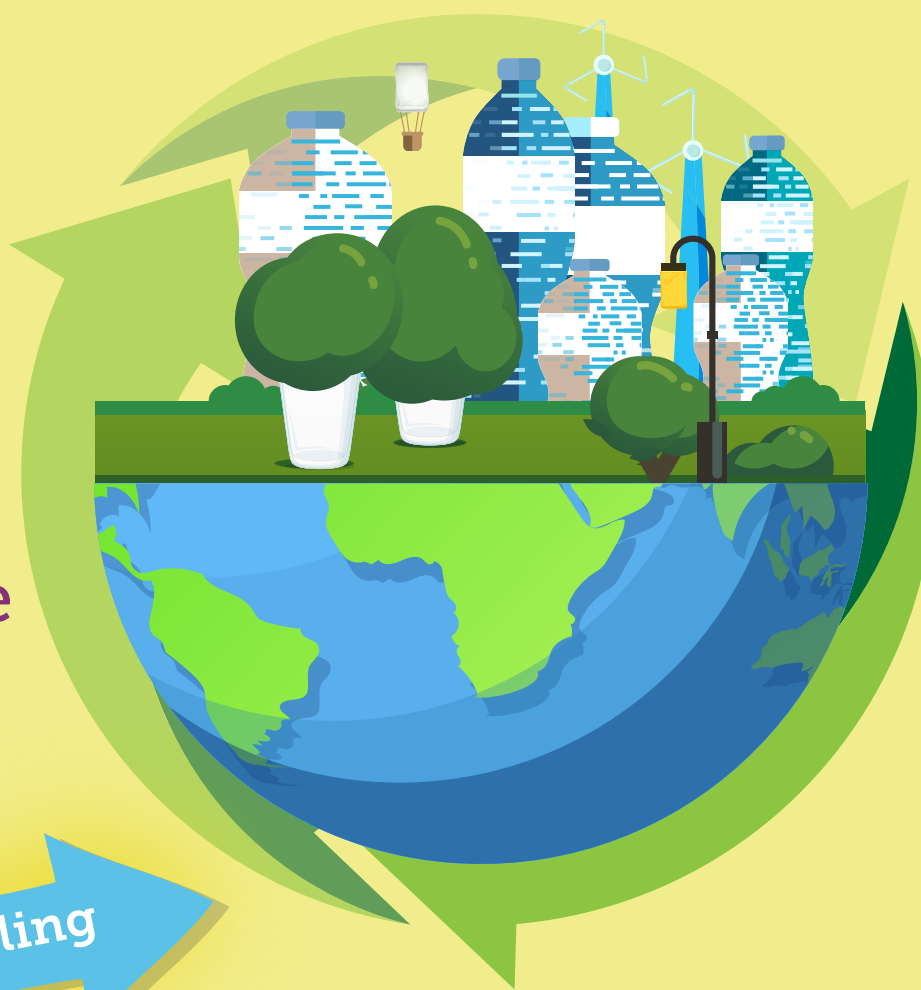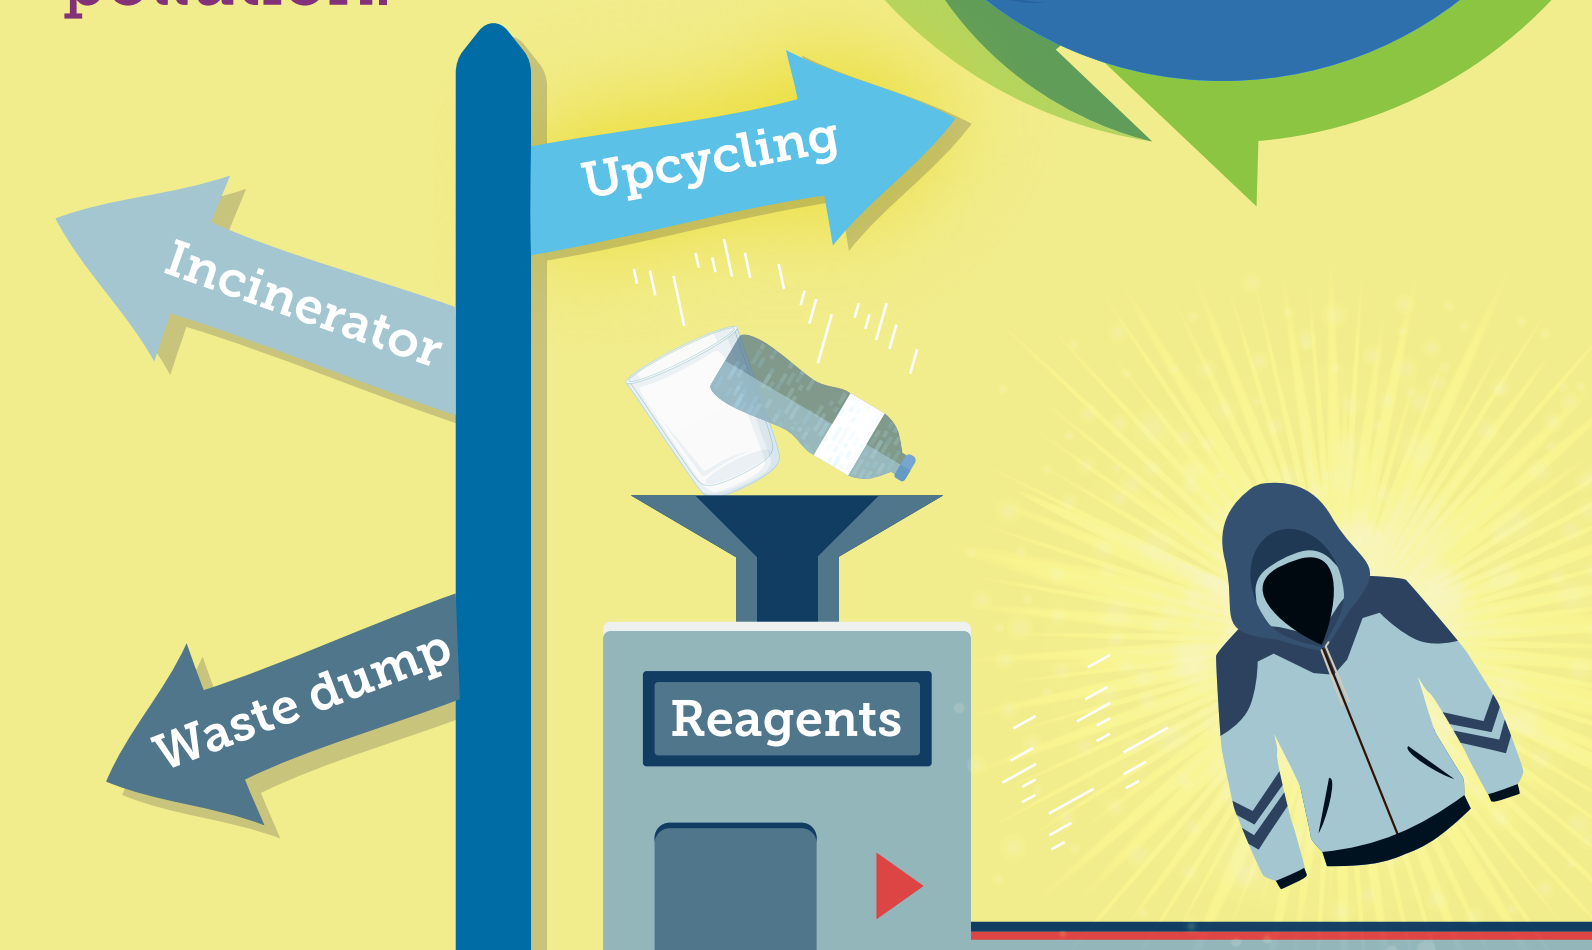

User friendly chemical methods to upcycle plastics to value added products is a potential solution.

## Novel method to upcycle polymers: A new life for plastics

Radical-mediated functionalization of post-consumer plastics

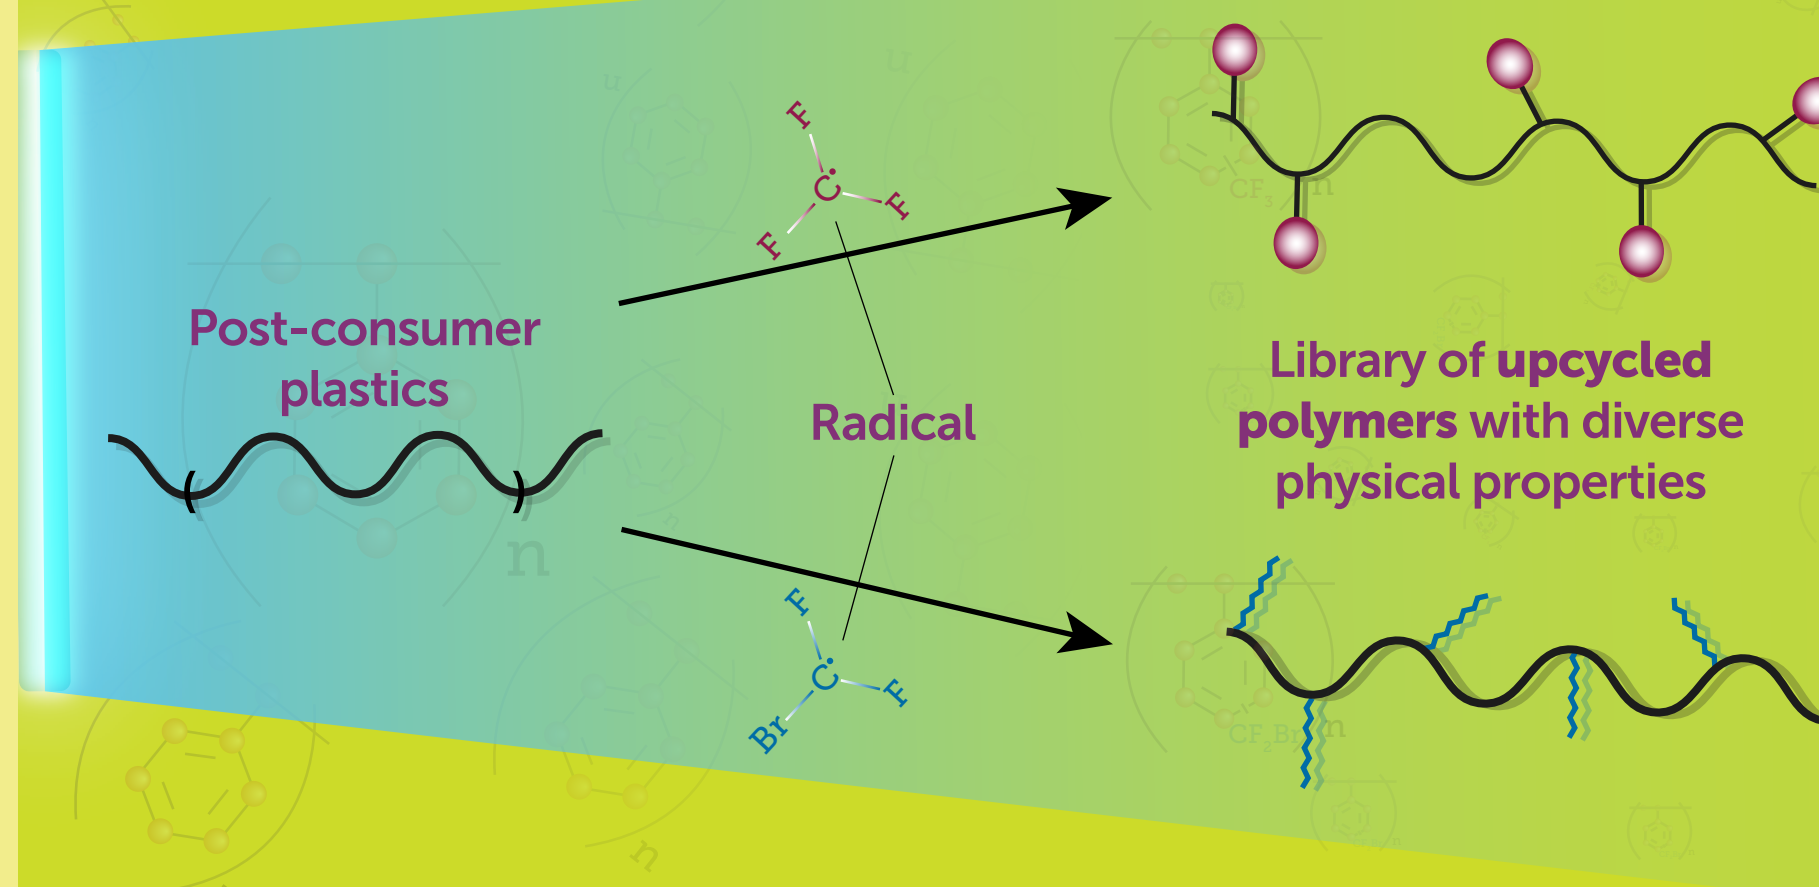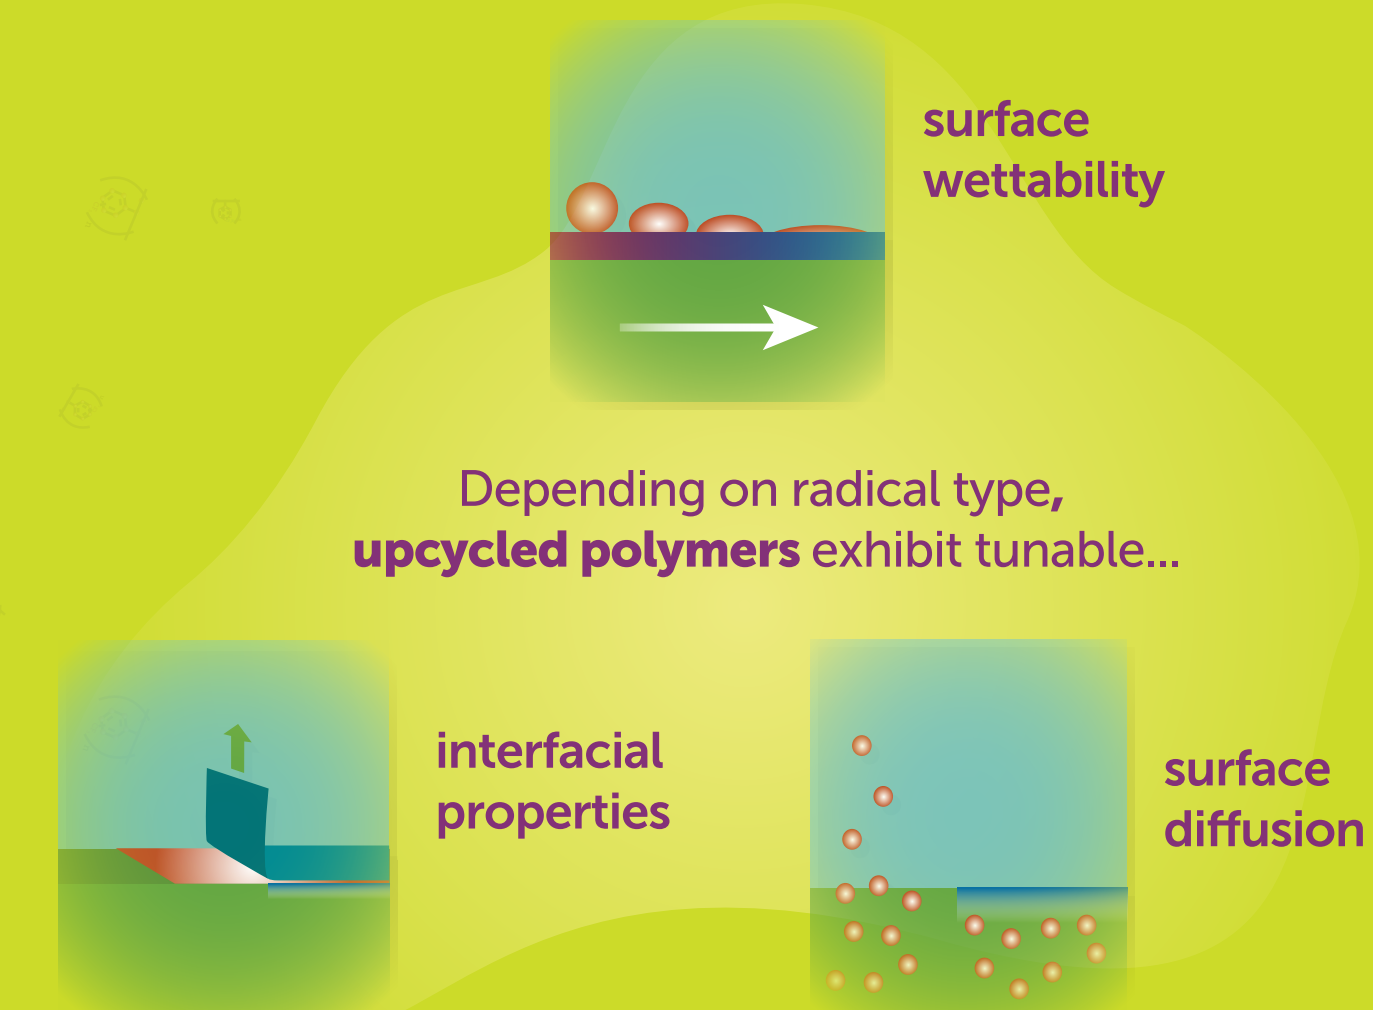

So, how does it add value?

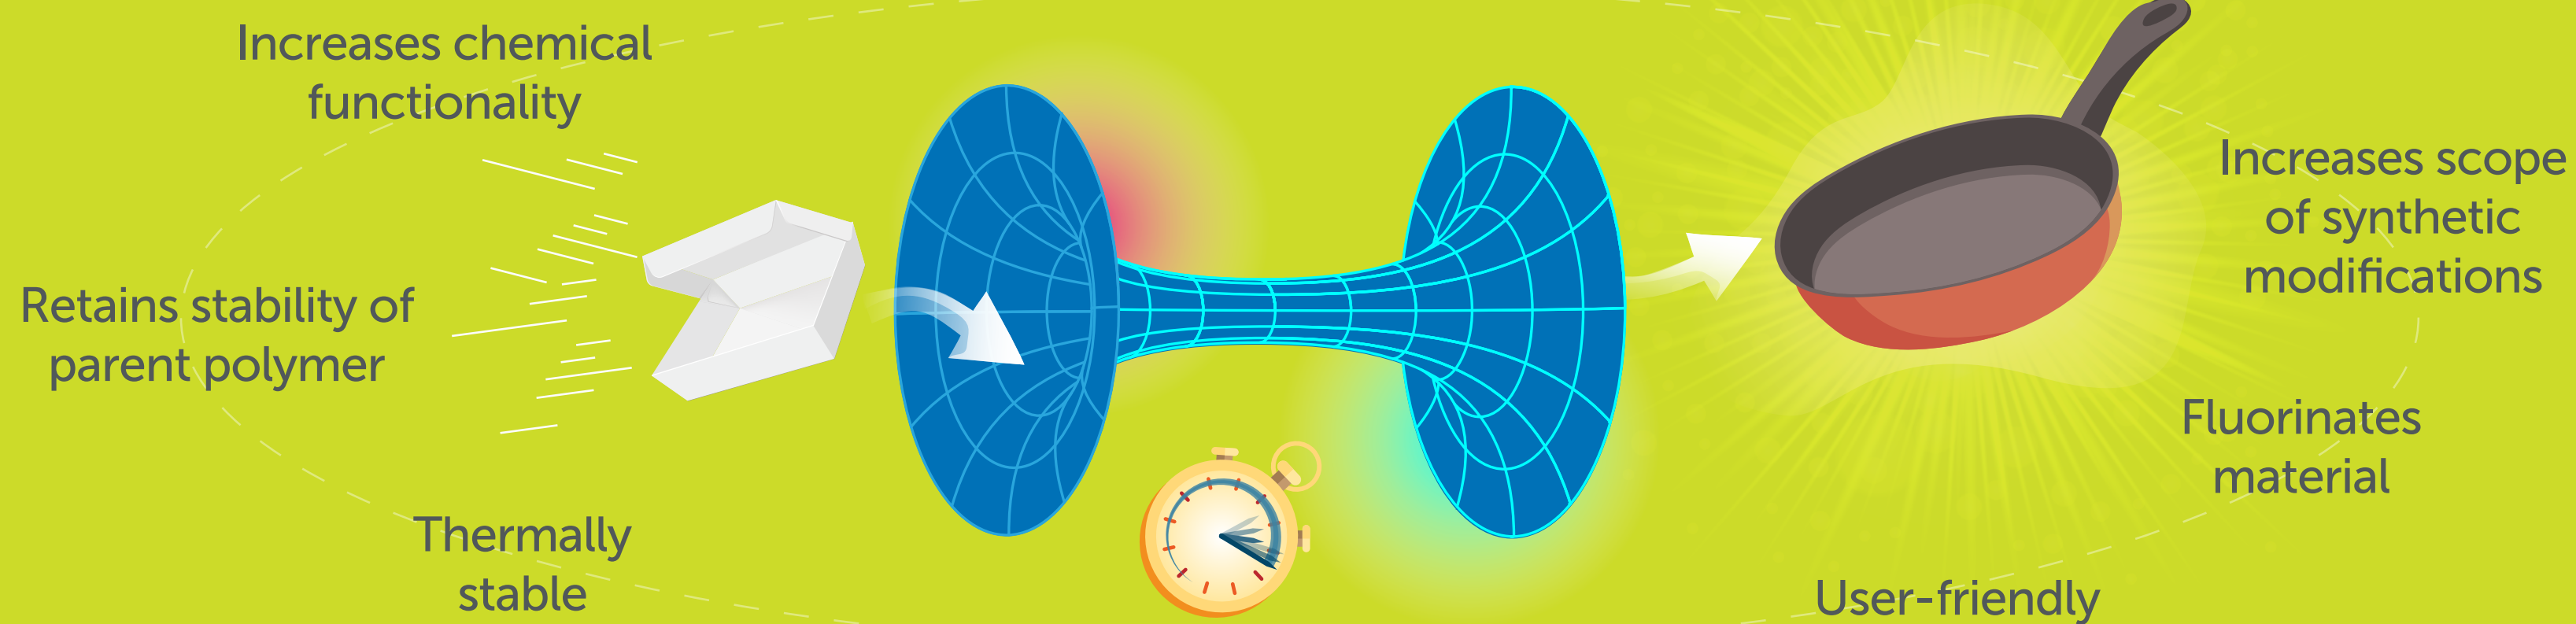

Modification of post-consumer plastics through radical-mediated functionalization results in value-added materials.

Chemical  
Science

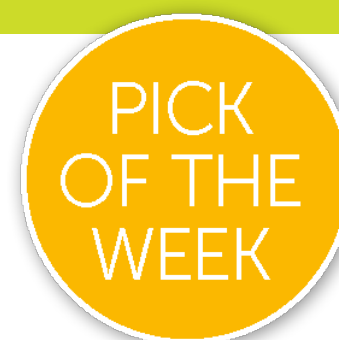

Upcycling aromatic polymers through C–H fluoroalkylation  
Leibfarth et al. (2019) | DOI: 10.1039/C9SC01425J

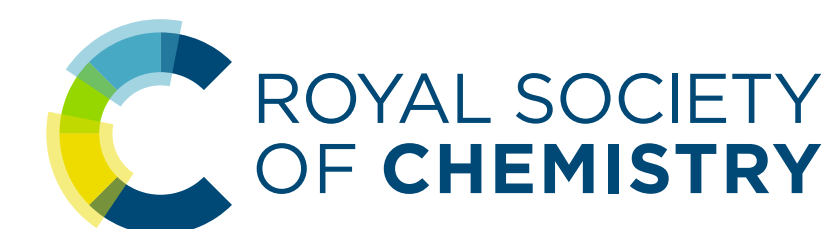

Supplement: c9sc01425j1.pdf [file c9sc01425j1.pdf]
